# Supplementary material for: Investigation of the structure and performance of Li[Li0.13Ni0.305Mn0.565]O2Li-rich cathode materials derived from eco-friendly and simple coating techniques
Source: Royal Society of Chemistry journal article supplement (doi:10.1039/c9ra09206d), 2020-01-01
Supplement: c9ra09206d1.pdf [file c9ra09206d1.pdf]

## Supporting Information

Investigation of the structure and performance of  
 $\text{Li}[\text{Li}_{0.13}\text{Ni}_{0.305}\text{Mn}_{0.565}]\text{O}_2$  Li-rich cathode materials derived from a  
eco-friendly and simple coated techniques

*Xiangnan Li*<sup>a,b,c</sup>, *Zhaoxia Cao*<sup>a,b,c</sup>, *Hongyu Dong*<sup>a,b,c</sup>, *Zhenpu Shi*<sup>a,b,c</sup>, *Huishuang  
Zhang*<sup>a,b,c</sup>, *Junyi Li*<sup>a,b,c</sup>, *Shuaijia Yang*<sup>a,b,c</sup>, *Shuting Yang*<sup>a,b,c\*</sup>

a. School of Physics, School of Chemistry and Chemical Engineering, Henan Normal University, Xinxiang Henan 453007, China;

b. National and Local joint Engineering Laboratory of Motive Power and Key Materials, Xinxiang Henan 453007, China;

c. Collaborative Innovation Center of Henan Province for Motive Power and Key Materials, Xinxiang Henan 453007, China;

\*Corresponding author. Prof.; Tel: (+86)373-3323366; E-mail:  
shutingyang@foxmail.com(S. Yang)

## Experimental Section

### *Preparation of the precursor of Li rich cathode material $\text{Li}[\text{Li}_{0.13}\text{Ni}_{0.305}\text{Mn}_{0.565}]\text{O}_2$ .*

The precursor was prepared by co-precipitation method. 2 M  $\text{NiSO}_4 \cdot 6\text{H}_2\text{O}$  and  $\text{MnSO}_4 \cdot \text{H}_2\text{O}$  mixed solution was continually pumped into a stirring tank reactor (50 L); then 4 M NaOH solution and 0.2 M  $\text{NH}_4\text{OH}$  solution were pumped into the reactor, separately. The reaction temperature was controlled at 55 °C and the value of pH was 10.75.

### *Preparation of Li rich cathode material $\text{Li}[\text{Li}_{0.13}\text{Ni}_{0.305}\text{Mn}_{0.565}]\text{O}_2$ .*

$\text{Li}[\text{Li}_{0.13}\text{Ni}_{0.305}\text{Mn}_{0.565}]\text{O}_2$  were synthesized via solid state reaction of  $\text{Li}_2\text{CO}_3$  and precursor. The precursor was prepared by co-precipitation method (in the Supporting Information). The precursor and  $\text{Li}_2\text{CO}_3$  was mixed well by ball milling. Afterwards, the mixture was calcined at 920 °C for 10 h under air atmosphere to obtain  $\text{Li}[\text{Li}_{0.13}\text{Ni}_{0.305}\text{Mn}_{0.565}]\text{O}_2$ .

### *Fabrication of $\text{Al}_2\text{O}_3$ -Coated Li rich cathode material by DPC.*

First the different quantities of  $\text{Al}_2\text{O}_3$  (0 g, 5g, 10 g, 15 g) were prepared. Then the LLNM (1000 g) and the different amount  $\text{Al}_2\text{O}_3$  were mixed into mixing pelletizer and stirred for 10 minutes, respectively. Afterwards, these mixed samples were calcined at 350°C for 2 h under air atmosphere and labeled as LLNM-A0, LLNM-A5, LLNM-A10 and LLNM-A15.

### *Materials Characterization*

Crystal structure of the synthesized powders was characterized by X-ray diffraction (XRD, AXS D8 Advance, Bruker) with Cu  $K\alpha$  radiation. Particle morphology was

conducted with a scanning electron microscope (SEM, SU-8010F, HITACHI) equipped with an energy dispersive spectroscope (EDS). Microstructural properties were obtained using high-resolution transmission electron microscopy (HR-TEM, Tecnai G2 F20, FEI). X-ray photoelectron spectroscopy analysis (XPS) was determined by a Kratos Axis Ultra spectrometer with a monochromatic Al K $\alpha$  radiation ( $h\nu = 1486.6$  eV). LLNM Li-rich cathode materials with Al<sub>2</sub>O<sub>3</sub> coating were prepared through DPC (NSEG-450).

### *Electrochemical Measurements*

For electrochemical evaluation, the Al<sub>2</sub>O<sub>3</sub> coating LLNM working electrode was manufactured: the active material acetylene black and polyvinylidene fluoride (PVDF) binder were mixed into N-methyl-2-pyrrolidone (NMP) at a weight ratio of 8:1:1. Whatman Glass Fiber was used as the separator, and Lithium metal was employed as the counter and reference electrode. 1M LiPF<sub>6</sub> dissolved in the ethylene carbonate (EC) and diethyl carbonate (DEC) (1:1 by volume) solution was employed as the electrolyte. Galvanostatic charge-discharge experiment data was collected using LAND Cell test system (CT2001A, Wuhan). The batteries were cycled at 0.1 C rate in the first three cycles and then cycled at 1 C rate; AC impedance measurements were performed by an electrochemical workstation (CHI660E, Shanghai). A perturbation of 5 mV was applied and the frequency range applied is from 0.1 Hz to 100 KHz.

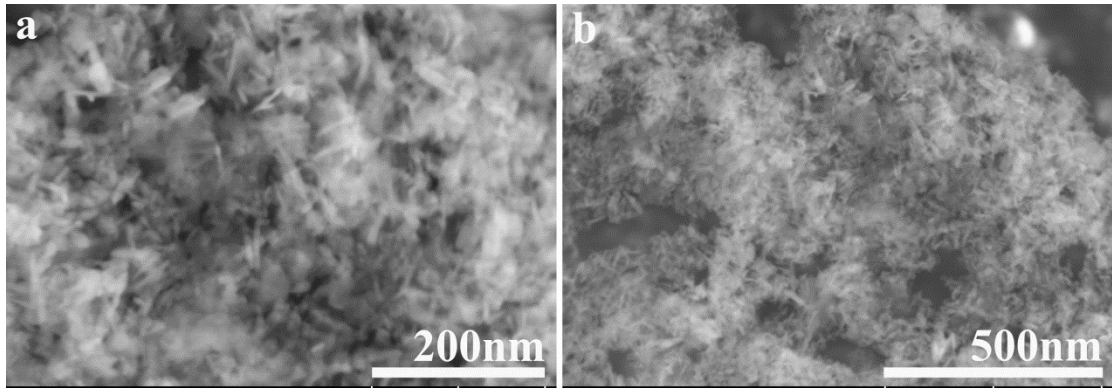

**Figure S1.** FESEM images of Al<sub>2</sub>O<sub>3</sub>

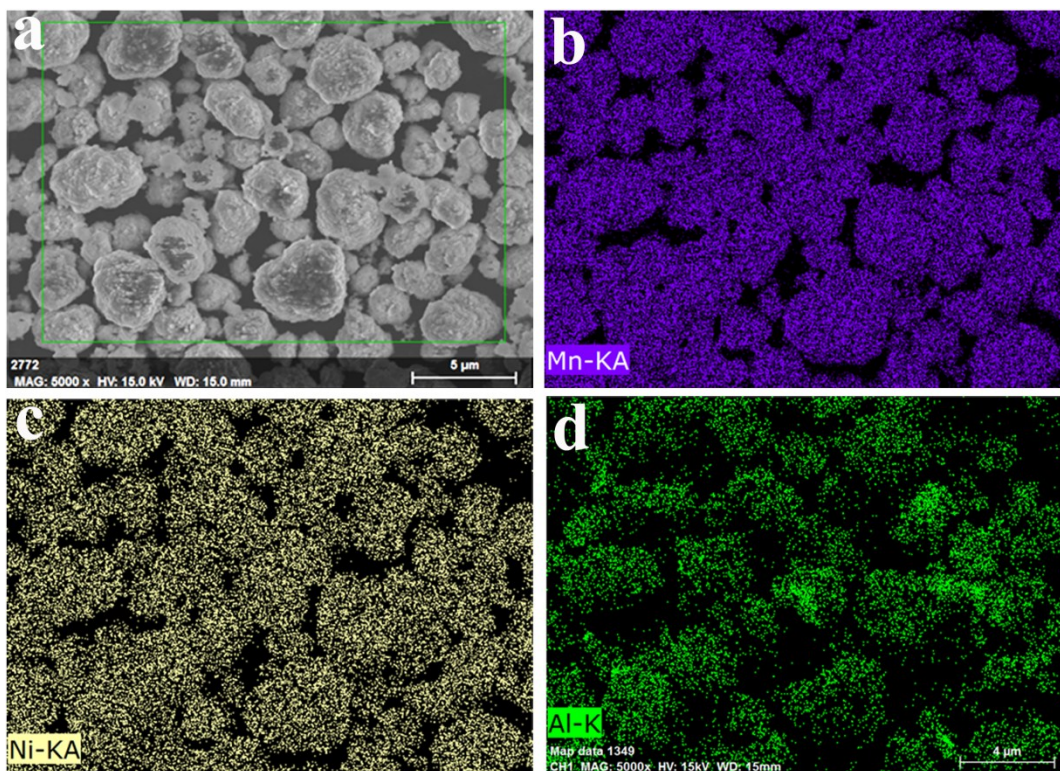

**Figure S2.** SEM and element mappings of LLNM-A10 (a-d).

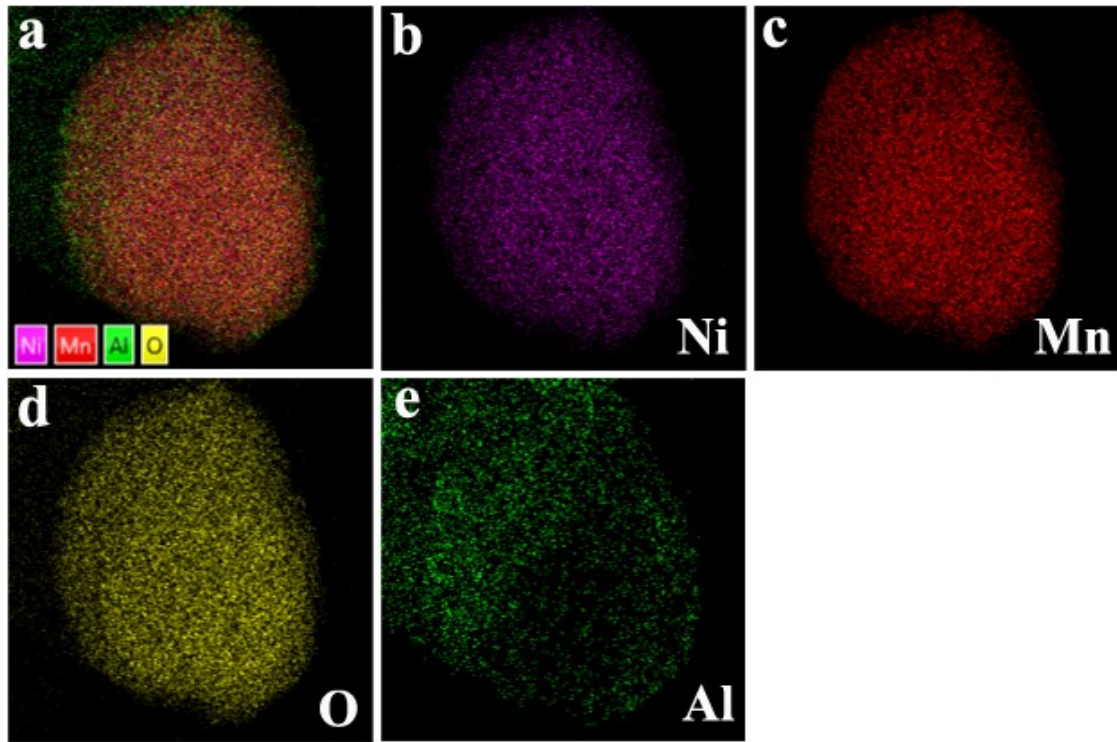

**Figure S3.** TEM element mappings of LLNM-A10 (a-e).

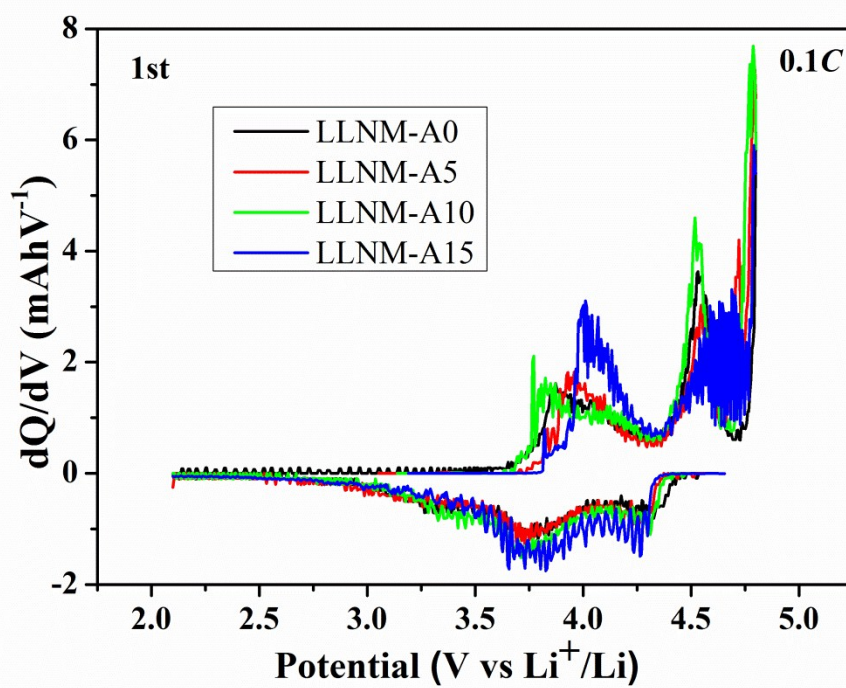

**Figure S4.** Differential capacity vs. voltage curves of the pristine and the coated LLNM cathode materials at 0.1 C for the first cycle.

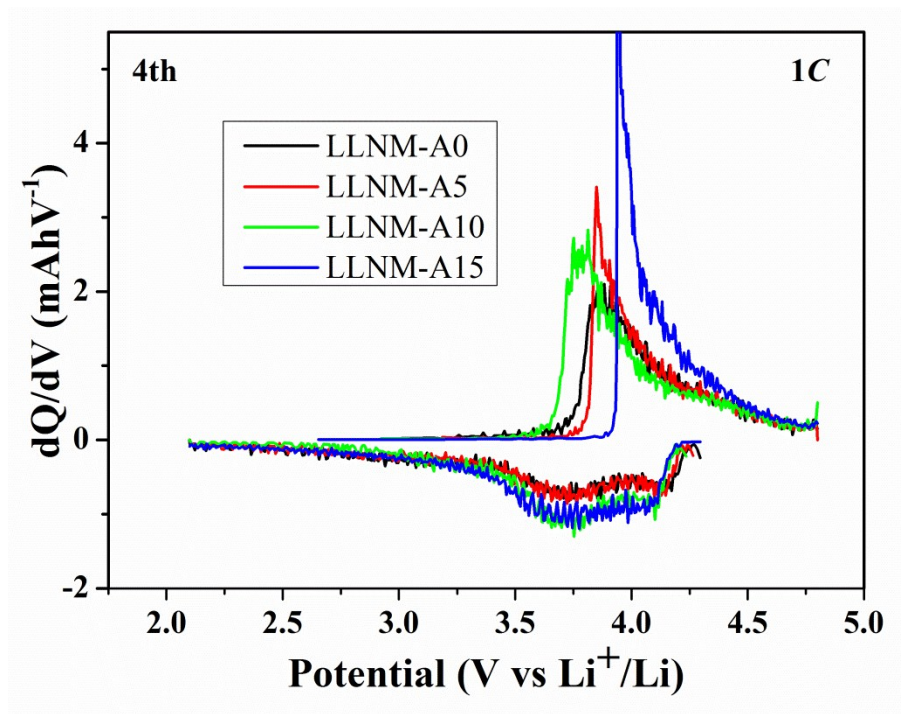

**Figure S5.** Differential capacity vs. voltage curves of the pristine and the coated LLNM cathode materials at 1 C for the 4th cycle.



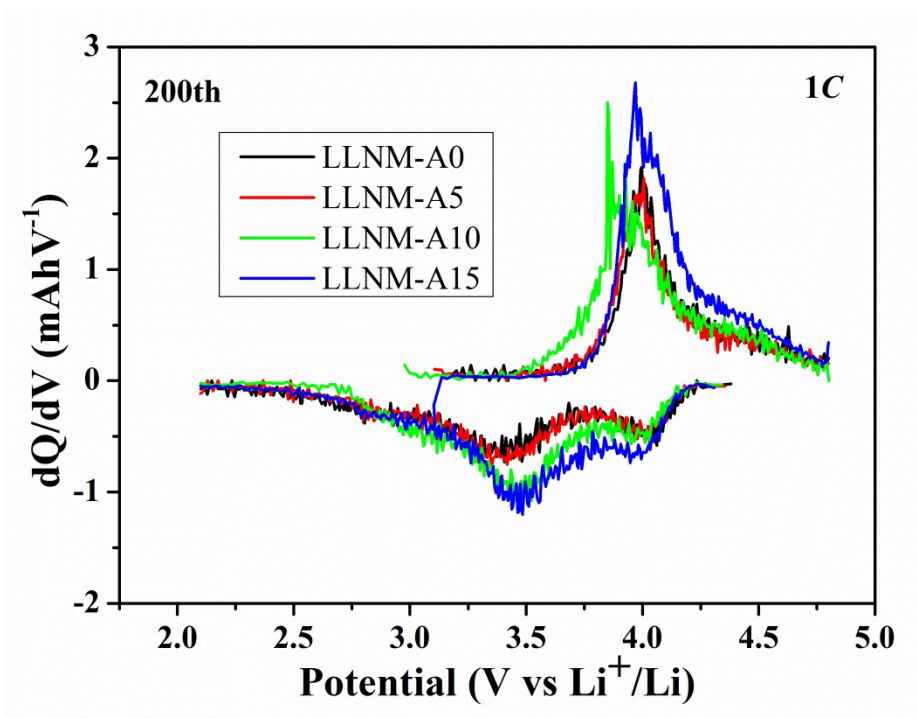

**Figure S6.** Differential capacity vs. voltage curves of the pristine and the coated LLNM cathode materials at 1 C for the 200th cycle.

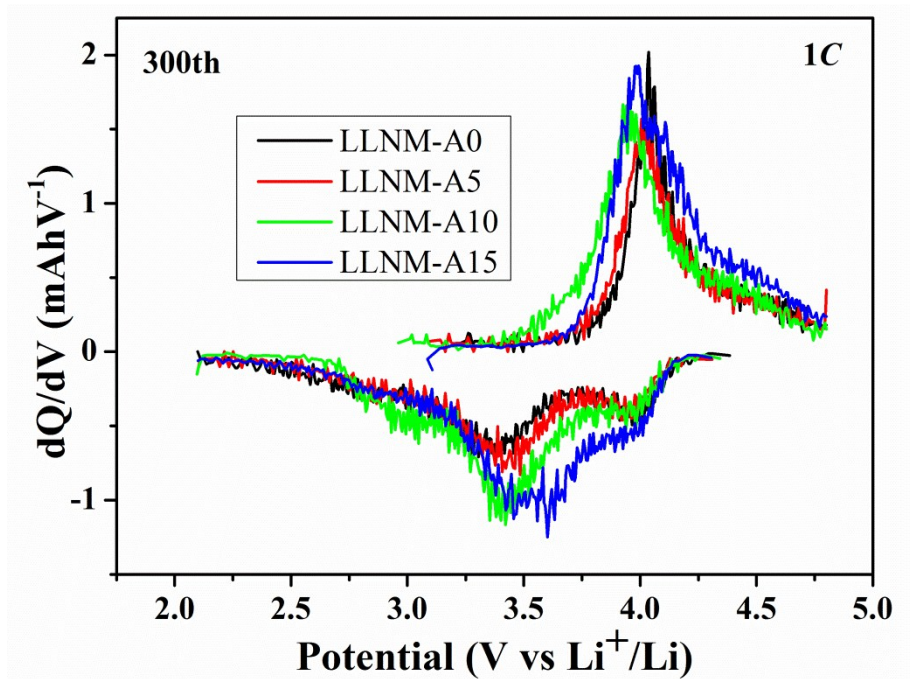

**Figure S7.** Differential capacity vs. voltage curves of the pristine and the coated LLNM cathode materials at 1 C for the 300th cycle.

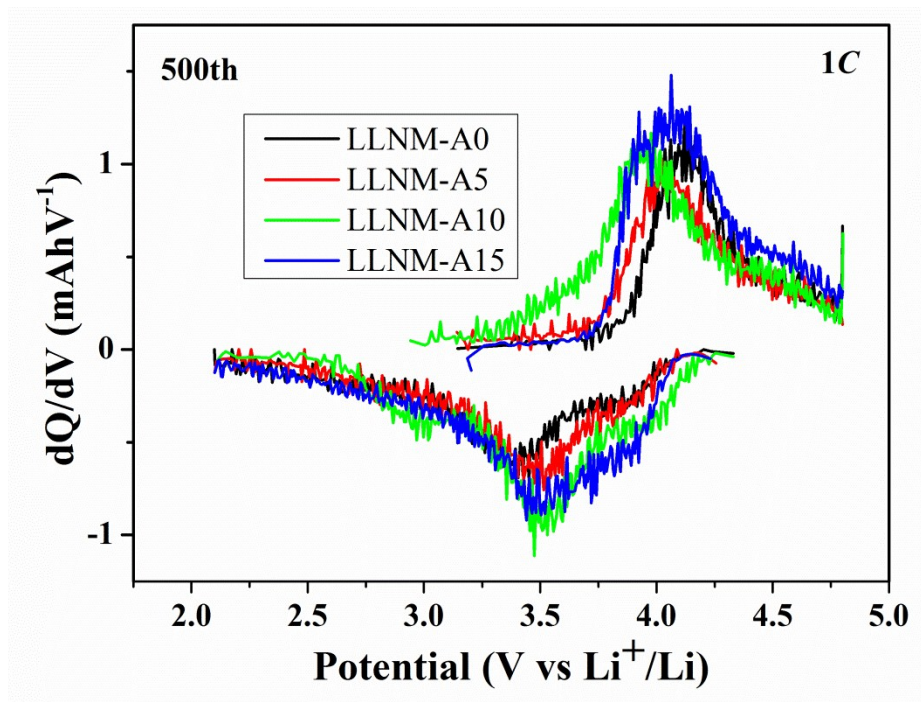

**Figure S8.** Differential capacity vs. voltage curves of the pristine and the coated LLNM cathode materials at 1 C for the 500th cycle.

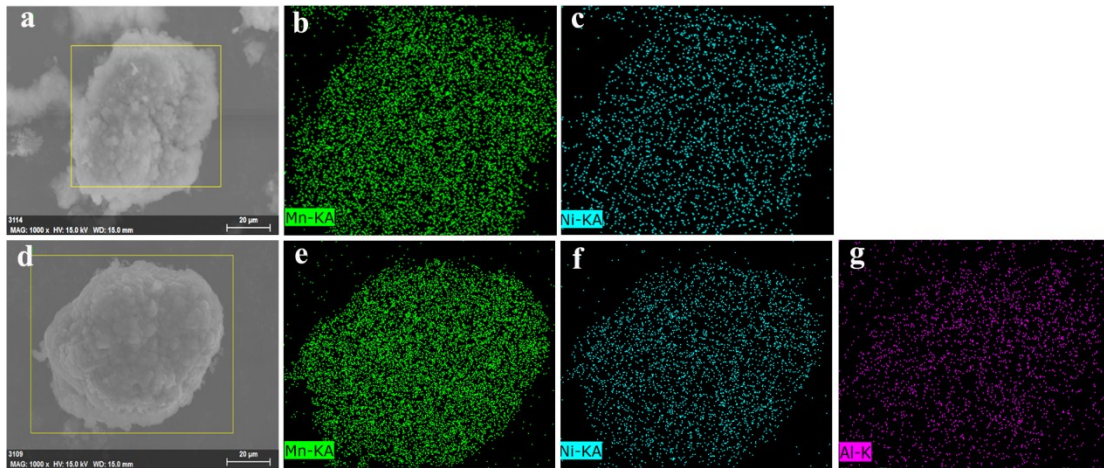

**Fig. S9.** SEM and element mappings of coating samples of LLNM-A0 (a, b, c) and LLNM-A10 (d, e, f, h, g) after 500 cycles.

Table S1. Comparison of the cycling performance among Al<sub>2</sub>O<sub>3</sub> coated Li-rich cathode materials

| Coated methode    | reversible capacity<br>(mAhg <sup>-1</sup> ) | cycle<br>number | Voltage<br>(V) | rate (mA g <sup>-1</sup> ) | ref. |
|-------------------|----------------------------------------------|-----------------|----------------|----------------------------|------|
| Chemical solution | 228                                          | 60              | 2.0-4.8        | 0.1C (1C = 250)            | 1    |
| Freeze Drying     | ~157                                         | 150             | 3.0-4.3        | 1C (1C = 200)              | 2    |
| Sol-gel           | 170                                          | 100             | 2.0-4.8        | 1C (1C = 200)              | 3    |
| ALD               | 120                                          | 20              | 2.0-4.8        | 1C (1C = 240)              | 4    |
| (This work)       | 170.7                                        | 100             | 2.1-4.8        | 1C (1C = 300)              | -    |
|                   | 153.8                                        | 500             | 2.1-4.8        | 1C (1C = 300)              | -    |

#### References

- [1] Wen, X. F.; Liang, K.; Tian, L. Y.; Shi, K. Y.; Zheng, J. S. Al<sub>2</sub>O<sub>3</sub> coating on Li<sub>1.256</sub>Ni<sub>0.198</sub>Co<sub>0.082</sub>Mn<sub>0.689</sub>O<sub>2.25</sub> with spinel–structure interface layer for superior performance lithium ion batteries. *Electrochi. Acta*, 2018, 260, 549–556.
- [2] Wang, J. P.; Du, C. Y.; Yan, C. Q.; He, X. S.; Song, B.; Yin, G. P.; Zuo, P. J.; Cheng, X. Q. Al<sub>2</sub>O<sub>3</sub> Coated Concentration-Gradient Li[Ni<sub>0.73</sub>Co<sub>0.12</sub>Mn<sub>0.15</sub>]O<sub>2</sub> Cathode Material by Freeze Drying for Long-Life Lithium Ion Batteries. *Electrochi. Acta*, 2015, 174, 1185–1191.
- [3] Zhang, W. X.; Liu, Y. T.; Wu, J. L.; Shao, H. X.; Yang, Y. F. Surface modification of Li<sub>1.2</sub>Mn<sub>0.54</sub>Ni<sub>0.13</sub>Co<sub>0.13</sub>O<sub>2</sub> cathode material with Al<sub>2</sub>O<sub>3</sub>/SiO<sub>2</sub> composite for lithium–ion batteries. *J. Electrochem. Soc.*, 2019, 166 (6), 863–872.
- [4] Dannehl, N.; Steinmuller, S. O.; Szabo, D. V.; Pein, M.; Sigel, F.; Esmezjan, L., Hasenkox, U.; Schwarz, B.; Indris, S.; Ehrenberg, H. High–resolution surface analysis on aluminum oxide–coated Li<sub>1.2</sub> Mn<sub>0.55</sub>Ni<sub>0.15</sub>Co<sub>0.1</sub>O<sub>2</sub> with improved capacity retention. *ACS Appl. Mater. Interfaces*, 2018, 10 (49), 43131–43143.
